# Supplementary material for: Exome sequencing of primary breast cancers with paired metastatic lesions reveals metastasis-enriched mutations in the A-kinase anchoring protein family (AKAPs)
Source: PubMed Central journal article supplement (PMC5810006; doi:10.1186/s12885-018-4021-6), 2018-02-12
Supplement: 12885_2018_4021_MOESM6_ESM.pdf [file 12885_2018_4021_MOESM6_ESM.pdf]

Table S3. Control experiment

|               | Average input<br>DNA (ng) | Somatic<br>mutations | False Discovery<br>Rate (%) | LOH of<br>heterozygous SNPs (%) | False LOH (%)  |
|---------------|---------------------------|----------------------|-----------------------------|---------------------------------|----------------|
| Germline      | 34.1 (10-103)             | -                    | -                           | -                               | -              |
| Primary Tumor | 22.4 (6.5-88.6)           | 222                  | 0                           | 5.2 (0.1-18)                    | 1.6 (0.1-8.3)  |
| Metastasis    | 24.9 (1.3-89.4)           | 706                  | 2.2 (0-7)                   | 18.9 (0-48) *                   | 5.7 (0-16.2) * |
| Control 6ng   | 6.0                       | 0                    | 100                         | 1                               | 100            |
| Control 0.6ng | 0.6                       | 27                   | 100                         | 0.6                             | 100            |
