# Supplementary material for: Exome sequencing of primary breast cancers with paired metastatic lesions reveals metastasis-enriched mutations in the A-kinase anchoring protein family (AKAPs)
Source: PubMed Central journal article supplement (PMC5810006; doi:10.1186/s12885-018-4021-6), 2018-02-12

# AKAP expression split by PAM50 subtype

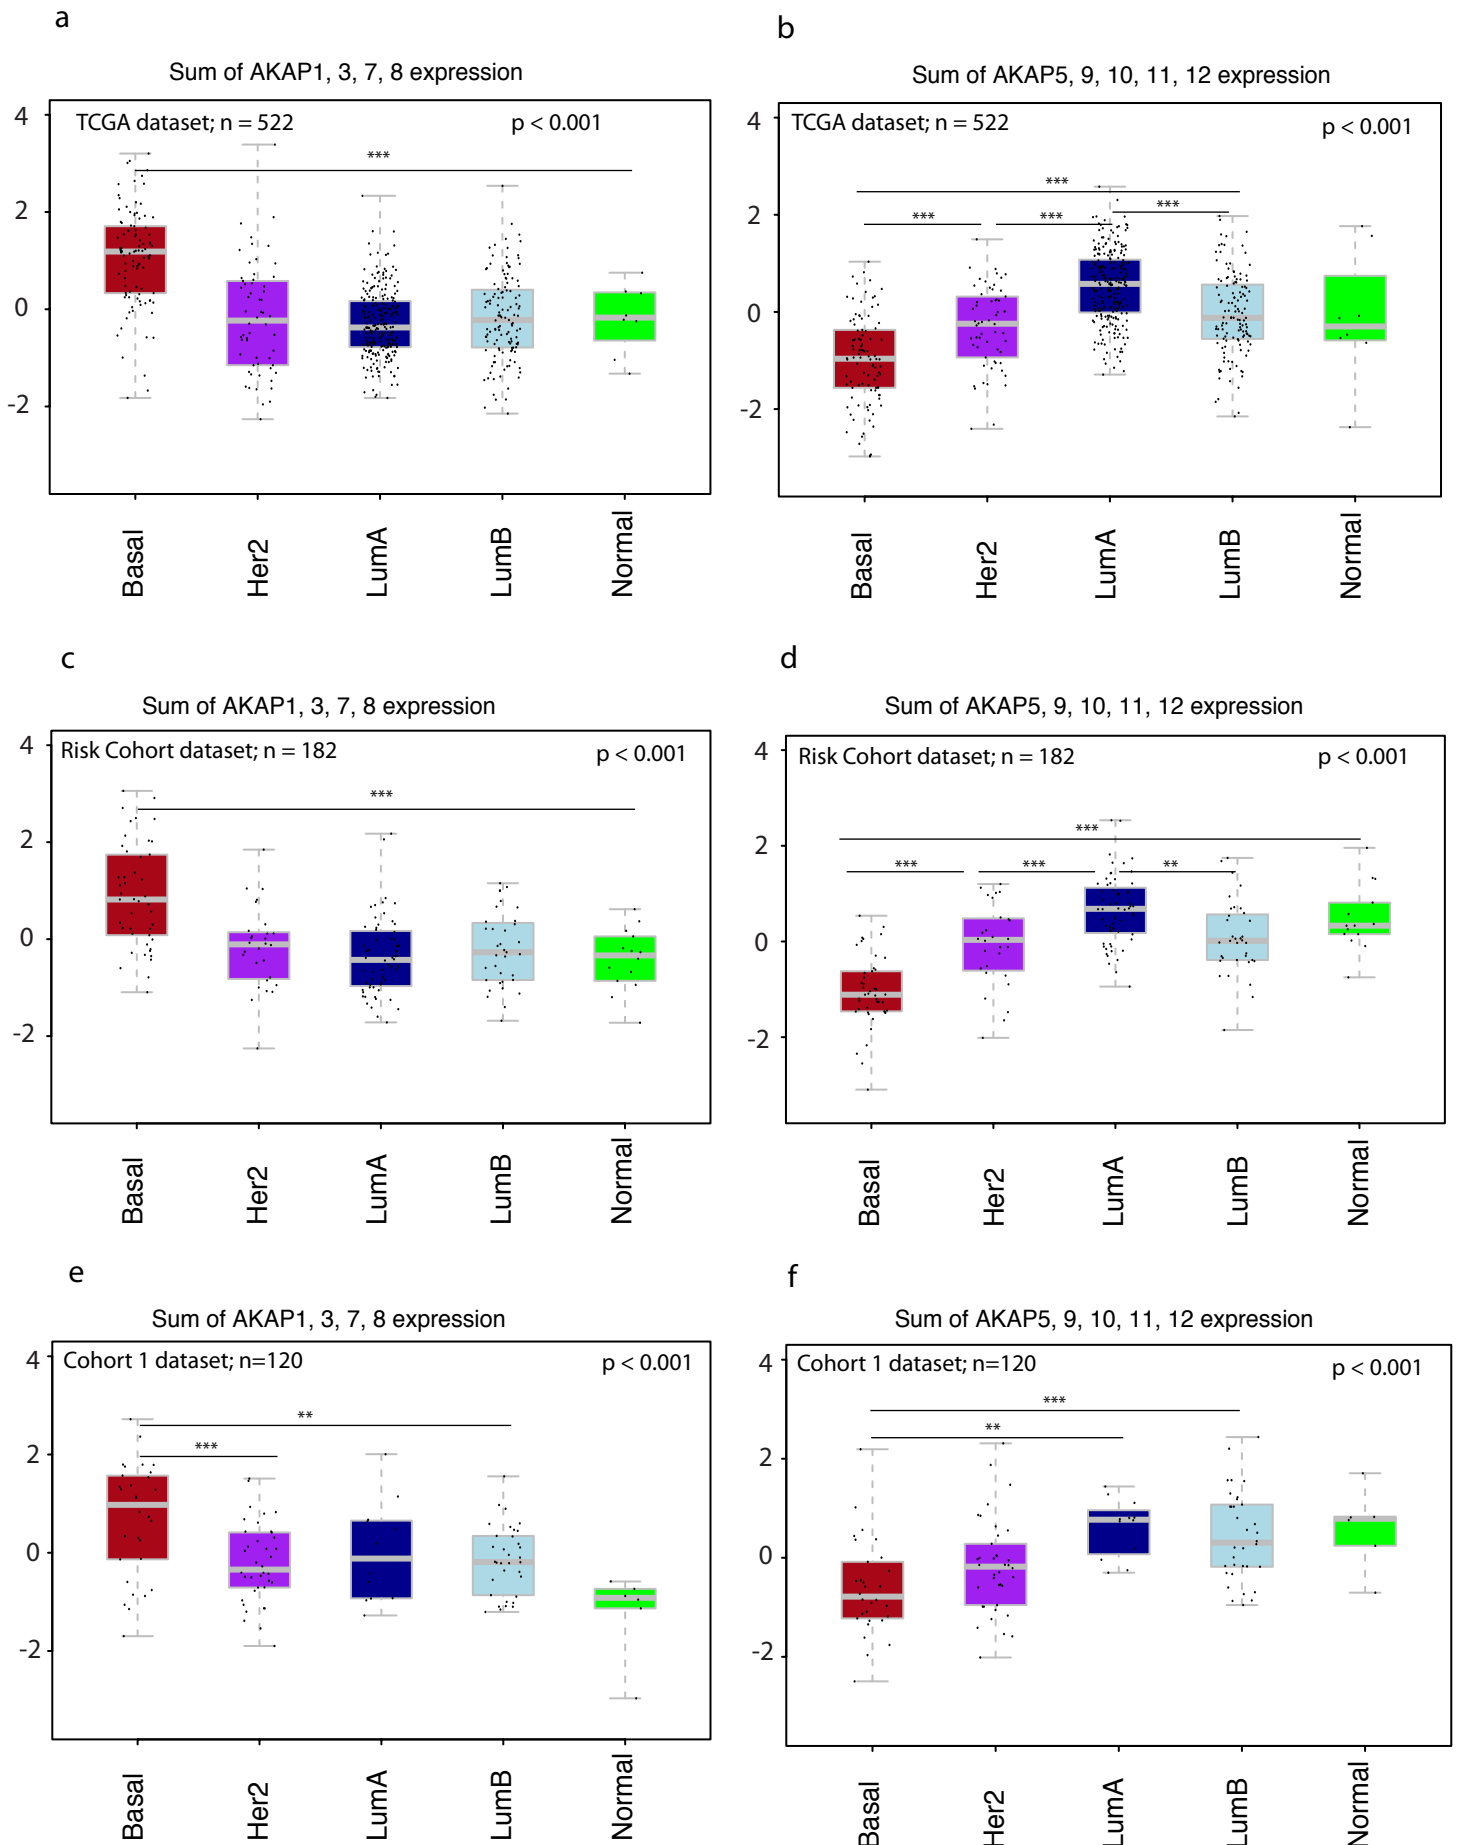

Supplement: 12885_2018_4021_MOESM8_ESM.pdf [file 12885_2018_4021_MOESM8_ESM.pdf]
