# Supplementary material for: Exome sequencing of primary breast cancers with paired metastatic lesions reveals metastasis-enriched mutations in the A-kinase anchoring protein family (AKAPs)
Source: Springer Nature journal article supplement (doi:10.1186/s12885-018-4021-6), 2018-02-12
Supplement: MOESM1 [file 15459718]

Table S1. Patient table cohort 2

| Patient ID | Sample          | Elston Grade | Tum size (mm) | ER | PR | HER2 | NeoAdj | AdjCT | AdjHT | AdjRT              | Relapse site | Time to Relapse* | Relapse to death** |
|------------|-----------------|--------------|---------------|----|----|------|--------|-------|-------|--------------------|--------------|------------------|--------------------|
| 1          | Primary Tumor   | 3            | 21            | -  | -  | -    | -      | +     | -     | +                  |              |                  |                    |
|            | Metastasis 1    |              |               | -  | -  | NA   |        |       |       |                    | lung         | 19               |                    |
|            | Metastasis 2    |              |               | -  | -  | NA   |        |       |       |                    | liver        | 49               | 35                 |
| 2          | Primary Tumor   | 3            | 20            | -  | -  | NA   | -      | -     | -     | -                  |              |                  |                    |
|            | Lymph node      |              |               |    |    |      |        |       |       |                    | lymph        |                  |                    |
| 3          | Primary Tumor   | 3            | 55            | -  | -  | +    | CT     | +     | -     | +                  |              |                  |                    |
|            | Lymph node      |              |               |    |    |      |        |       |       |                    | lymph        |                  |                    |
| 4          | Primary Tumor   | 3            | 20            | -  | -  | NA   | -      | -     | -     | -                  |              |                  |                    |
|            | Metastasis 2    |              |               | NA | NA | NA   |        |       |       | uterus             | 74           |                  |                    |
|            | Metastasis 3    |              |               | -  | -  | NA   |        |       |       | brain              | 93           |                  |                    |
|            | Metastasis 4    |              |               | +  | -  | NA   |        |       |       | colon              | 97           | 60               |                    |
| 5          | Primary Tumor   | 3            | 25            | +  | -  | NA   | HT     | -     | +     | +                  |              |                  |                    |
|            | Metastasis 1    |              |               | -  | -  | NA   |        |       |       | bone               | 31           |                  |                    |
|            | Metastasis 2    |              |               | NA | NA | NA   |        |       |       | bone               | 49           | 28               |                    |
| 6          | Primary Tumor   | 2            | 20            | +  | +  | +    | -      | +     | +     | +                  |              |                  | 48                 |
| 7          | (Primary Tumor) | 3            |               | NA | NA | -    | -      | +     | +     | +                  |              |                  |                    |
|            | Local relapse   |              |               | +  | -  | +    |        |       |       | chest wall         | 54           |                  |                    |
|            | Metastasis 1    |              |               | +  | -  | +    |        |       |       | skin               | 64           | 29               |                    |
| 8          | Primary Tumor   | 3            | 45            | -  | -  | -    | -      | +     | +     | +                  |              |                  |                    |
|            | Lymph node      |              |               |    |    |      |        |       |       |                    |              |                  |                    |
|            | Local rel       |              |               | +  | -  | +    |        |       |       | skin local relapse | 49           |                  |                    |
| 9          | Primary Tumor   | 3            | 18            | +  | -  | +    | -      | +     | +     | +                  |              |                  |                    |
|            | Metastasis 1    |              |               | -  | -  | -    |        |       |       | brain              | 26           | 23               |                    |
|            |                 |              |               |    |    |      |        |       |       |                    |              |                  |                    |
| 10         | Primary Tumor   | 3            | 45            | -  | -  | +    | -      | +     | -     | +                  |              |                  |                    |
|            | Lymph node      |              |               |    |    |      |        |       |       | lymph              |              |                  |                    |
|            | Metastasis 2    |              |               | -  | -  | NA   |        |       |       | skin               | 54           | 60               |                    |
| 11         | Primary Tumor   | 3            | 35            | -  | +  | NA   | -      | +     | +     | +                  |              |                  |                    |
|            | Metastasis 1    |              |               | -  | -  | NA   |        |       |       | brain              | 24           | 10               |                    |
| 12         | Primary Tumor   | 3            | 55            | -  | -  | NA   | -      | -     | -     | -                  |              |                  |                    |
|            | Local relapse   |              |               | -  | -  | NA   |        |       |       | axillary lymph     | 19           |                  |                    |
|            | Metastasis 1    |              |               |    |    |      |        |       |       | bone               | 39           | 41               |                    |
| 13         | (Primary Tumor) | 3            |               | NA | NA | NA   | -      | NA    | NA    | +                  |              |                  |                    |
|            | Local relapse   |              |               | +  | +  | NA   |        |       |       | breast             | 84           |                  |                    |
|            | Local relapse   |              |               |    |    |      |        |       |       | lymph              | 120          | 79               |                    |
|            | Metastasis 1    |              |               | NA | NA | NA   |        |       |       | bone               | 156          |                  |                    |
| 14         | Primary Tumor   | 3            | 30            | +  | +  | +    | -      | +     | +     | +                  |              |                  |                    |
|            | Lymph node      |              |               |    |    |      |        |       |       | lymph              |              |                  |                    |
|            | Metastasis 1    |              |               | NA | NA | NA   |        |       |       | cerebellum         | 26           | 83               |                    |
| 15         | Primary Tumor   | NA           | 10            | +  | NA | NA   | -      | +     | +     | +                  |              |                  |                    |
|            | Lymph node      |              |               |    |    |      |        |       |       | lymph              |              |                  |                    |
|            | Metastasis 1    |              |               | NA | NA | NA   |        |       |       | liver              | 116          | 26               |                    |
| 16         | (Primary Tumor) | 3            | 35            | -  | -  | +    | -      | +     | -     | -                  |              |                  |                    |
|            | Local relapse   |              |               | -  | -  | +    |        |       |       | breast             | 12           |                  |                    |
|            | Metastasis 1    |              |               | NA | NA | NA   |        |       |       | skin               | 16           | 27               |                    |
| 17         | Primary Tumor   | 3            | 18            | +  | +  | NA   | -      | -     | +     | +                  |              |                  |                    |
|            | Lymph node      |              |               |    |    |      |        |       |       | lymph              |              |                  |                    |
|            | Metastasis 1    |              |               | -  | -  | NA   |        |       |       | brain              | 75           | 5                |                    |
| 18         | Primary Tumor   | 2            | 20            | +  | +  | -    | -      | +     | +     | +                  |              |                  |                    |
|            | Lymph node      |              |               |    |    |      |        |       |       | lymph              |              |                  |                    |
|            | Metastasis 2    |              |               | +  | +  | +    |        |       |       | skin               | 87           | 47               |                    |
| 19         | Primary Tumor   | 2            | 20            | +  | +  | NA   | CT     | +     | +     | +                  |              |                  |                    |
|            | Metastasis 3    |              |               | -  | -  | +    |        |       |       | brain              | 73           |                  |                    |
|            | Metastasis 5    |              |               | NA | NA | NA   |        |       |       | brain              | 88           | 79               |                    |
| 20         | Primary Tumor   | 2            | 20            | -  | +  | +    | CT     | -     | +     | -                  |              |                  |                    |
|            | Metastasis 2    | 2            |               | +  | +  | +    |        |       |       |                    | ovary        | 262              |                    |
