# Supplementary material for: Exome sequencing of primary breast cancers with paired metastatic lesions reveals metastasis-enriched mutations in the A-kinase anchoring protein family (AKAPs)
Source: Springer Nature journal article supplement (doi:10.1186/s12885-018-4021-6), 2018-02-12
Supplement: MOESM2 [file 15459718]

Table S2. DNA concentrations

|                    |                                      | ID       | Extracted DNA Concentration (ng/ul) | Total input to WGA (ng) | Total amount DNA after WGA (ug) |
|--------------------|--------------------------------------|----------|-------------------------------------|-------------------------|---------------------------------|
| Cohort 1           | Primary tumors (fresh frozen)        | P1       | 233.55                              | 10                      | 4.3                             |
|                    |                                      | P2       | 239.55                              | 10                      | 3.9                             |
|                    |                                      | P3       | 15.13                               | 10                      | 8.3                             |
|                    |                                      | P4       | 23.05                               | 10                      | 11.0                            |
|                    |                                      | P5       | 545.98                              | 10                      | 26.5                            |
|                    |                                      | P6       | 280.21                              | 10                      | 6.0                             |
|                    |                                      | P7       | 55.91                               | 10                      | 8.8                             |
|                    |                                      | P8       | 1.3                                 | 6.5                     | 30.8                            |
|                    |                                      | P9       | 422.5                               | 88.6                    | 30.4                            |
|                    |                                      | P10      | 292.5                               | 59.2                    | 34.8                            |
|                    | Metastasis (fine needle aspirations) | P1       | 5.9                                 | 1.29                    | 7.1                             |
|                    |                                      | P2       | 9.6                                 | 4.12                    | 6.3                             |
|                    |                                      | P3       | 19.5                                | 4.46                    | 19.4                            |
|                    |                                      | P4       | 7.6                                 | 2.5                     | 8.4                             |
|                    |                                      | P5       | 3                                   | 4.49                    | 12.3                            |
|                    |                                      | P6       | 54                                  | 78.4                    | 17.9                            |
|                    |                                      | P7       | 117                                 | 54.2                    | 15.6                            |
|                    |                                      | P8       | 1.3                                 | 6.5                     | 17.3                            |
|                    |                                      | P9       | 687.5                               | 89.4                    | 71.1                            |
|                    |                                      | P10      | 4.5                                 | 3.8                     | 12.5                            |
|                    | Blood (fresh frozen)                 | P1       | 916                                 | 10                      | 32.3                            |
|                    |                                      | P2       | 400                                 | 10                      | 39.7                            |
|                    |                                      | P3       | 36                                  | 10                      | 36.0                            |
|                    |                                      | P4       | 280                                 | 10                      | 30.6                            |
|                    |                                      | P5       | 132                                 | 10                      | 42.8                            |
|                    |                                      | P6       | 92                                  | 10                      | 32.2                            |
|                    |                                      | P7       | 41                                  | 10                      | 31.7                            |
|                    |                                      | P8       | 47.2                                | 94.4                    | 27.2                            |
|                    |                                      | P9       | 320                                 | 102                     | 10.2                            |
|                    |                                      | P10      | 315                                 | 74.6                    | 49.9                            |
| Control experiment | normal DNA                           | 1:1      | 313                                 | 626                     | -                               |
|                    |                                      | 1:100    |                                     | 6                       | 120.0                           |
|                    |                                      | 1:1000   |                                     | 0.6                     | 86.16                           |
| Cohort 2           | Primary tumors (FFPE)                | 1        | 149.5                               |                         |                                 |
|                    |                                      | 2        | 247.6                               |                         |                                 |
|                    |                                      | 3        | 82.6                                |                         |                                 |
|                    |                                      | 4        | 102.5                               |                         |                                 |
|                    |                                      | 5        | 289.8                               |                         |                                 |
|                    |                                      | 6        | 44.0                                |                         |                                 |
|                    |                                      | 7        | 31.2                                |                         |                                 |
|                    |                                      | 8        | 89.8                                |                         |                                 |
|                    |                                      | 9        | 376.9                               |                         |                                 |
|                    |                                      | 10       | 112.7                               |                         |                                 |
|                    |                                      | 11       | 60.3                                |                         |                                 |
|                    |                                      | 12       | 210.7                               |                         |                                 |
|                    |                                      | 13       | 124.3                               |                         |                                 |
|                    |                                      | 14       | 97.3                                |                         |                                 |
|                    |                                      | 15       | 37.2                                |                         |                                 |
|                    |                                      | 16       | 182.4                               |                         |                                 |
|                    |                                      | 17       | 48.0                                |                         |                                 |
|                    |                                      | 18       | 83.0                                |                         |                                 |
|                    |                                      | 19       | 251.0                               |                         |                                 |
|                    |                                      | 20       | 43.5                                |                         |                                 |
|                    | Metastases (FFPE)                    | 1 lung   | 357.9                               |                         |                                 |
|                    |                                      | 1 liver  | 54.5                                |                         |                                 |
|                    |                                      | 2 lymph  | 150.7                               |                         |                                 |
|                    |                                      | 2 colon  | 254.5                               |                         |                                 |
|                    |                                      | 3 lymph  | 77.2                                |                         |                                 |
|                    |                                      | 3 bone   | 27.6                                |                         |                                 |
|                    |                                      | 4 uterus | 33.4                                |                         |                                 |
|                    |                                      | 4 brain  | 176.1                               |                         |                                 |
|                    |                                      | 4 colon  | 29.4                                |                         |                                 |
|                    |                                      | 5 bone   | 283.1                               |                         |                                 |
|                    |                                      | 5 bone   | 178.0                               |                         |                                 |
|                    |                                      | 7 skin   | 13.0                                |                         |                                 |
|                    |                                      | 8 skin   | 19.9                                |                         |                                 |
|                    |                                      | 8 bone   | 509.0                               |                         |                                 |
|                    |                                      | 9 brain  | 227.6                               |                         |                                 |
|                    |                                      | 10 lymph | 229.1                               |                         |                                 |
|                    |                                      | 10 skin  | 124.8                               |                         |                                 |
|                    |                                      | 11 brain | 21.9                                |                         |                                 |
|                    |                                      | 12 lymph | 31.3                                |                         |                                 |
|                    | 12 bone                              | 60.7     |                                     |                         |                                 |
|                    | 13 lymph                             | 102.7    |                                     |                         |                                 |
|                    | 13 bone                              | 101.0    |                                     |                         |                                 |
| 14 lymph           | 122.4                                |          |                                     |                         |                                 |
| 14 cerebellum      | 119.1                                |          |                                     |                         |                                 |
| 15 lymph           | 86.5                                 |          |                                     |                         |                                 |
| 16 skin            | 89.3                                 |          |                                     |                         |                                 |
| 17 lymph           | 132.0                                |          |                                     |                         |                                 |
| 17 brain           | 50.7                                 |          |                                     |                         |                                 |
| 18 lymph           | 83.3                                 |          |                                     |                         |                                 |
| 18 skin            | 470.5                                |          |                                     |                         |                                 |
| 19 brain           | 142.7                                |          |                                     |                         |                                 |
| 19 brain           | 71.3                                 |          |                                     |                         |                                 |
| (Fresh DNA)        | 20 ovary                             | 16.7     |                                     |                         |                                 |
| Control DNA (FFPE) | 1                                    | 29.2     |                                     |                         |                                 |
|                    | 2                                    | 193.3    |                                     |                         |                                 |
|                    | 3                                    | 93.4     |                                     |                         |                                 |
|                    | 4                                    | 23.4     |                                     |                         |                                 |
|                    | 5                                    | 17.3     |                                     |                         |                                 |
|                    | 6                                    | 161.4    |                                     |                         |                                 |
|                    | 7                                    | 37.3     |                                     |                         |                                 |
|                    | 8                                    | 55.6     |                                     |                         |                                 |
|                    | 9                                    | 4.3      |                                     |                         |                                 |
|                    | 10                                   | 98.9     |                                     |                         |                                 |
|                    | 11                                   | 13.3     |                                     |                         |                                 |
|                    | 12                                   | 145.1    |                                     |                         |                                 |
| 13                 | 334.9                                |          |                                     |                         |                                 |
| 14                 | 57.8                                 |          |                                     |                         |                                 |
| 15                 | 168.7                                |          |                                     |                         |                                 |
| 16                 | 25.4                                 |          |                                     |                         |                                 |
| 17                 | 95.9                                 |          |                                     |                         |                                 |
| 18                 | 20.0                                 |          |                                     |                         |                                 |
| 19                 | 81.9                                 |          |                                     |                         |                                 |
| 20                 | 38.0                                 |          |                                     |                         |                                 |
