# Supplementary material for: Exome sequencing of primary breast cancers with paired metastatic lesions reveals metastasis-enriched mutations in the A-kinase anchoring protein family (AKAPs)
Source: Springer Nature journal article supplement (doi:10.1186/s12885-018-4021-6), 2018-02-12

a)

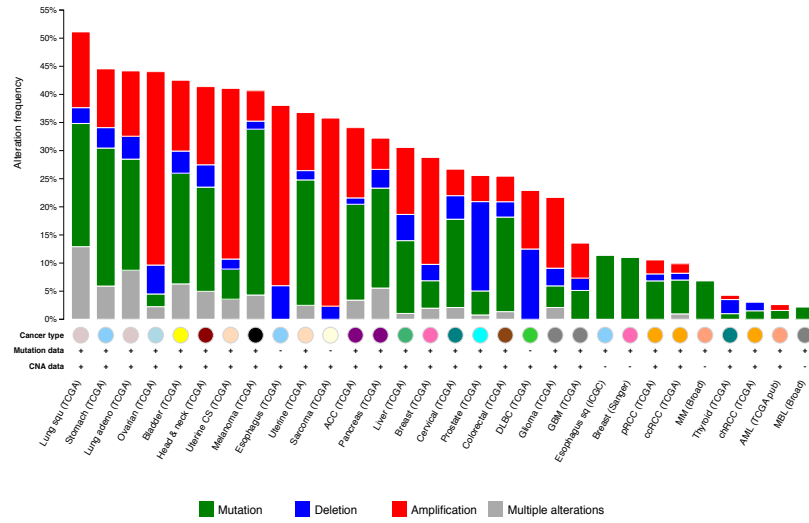

b)

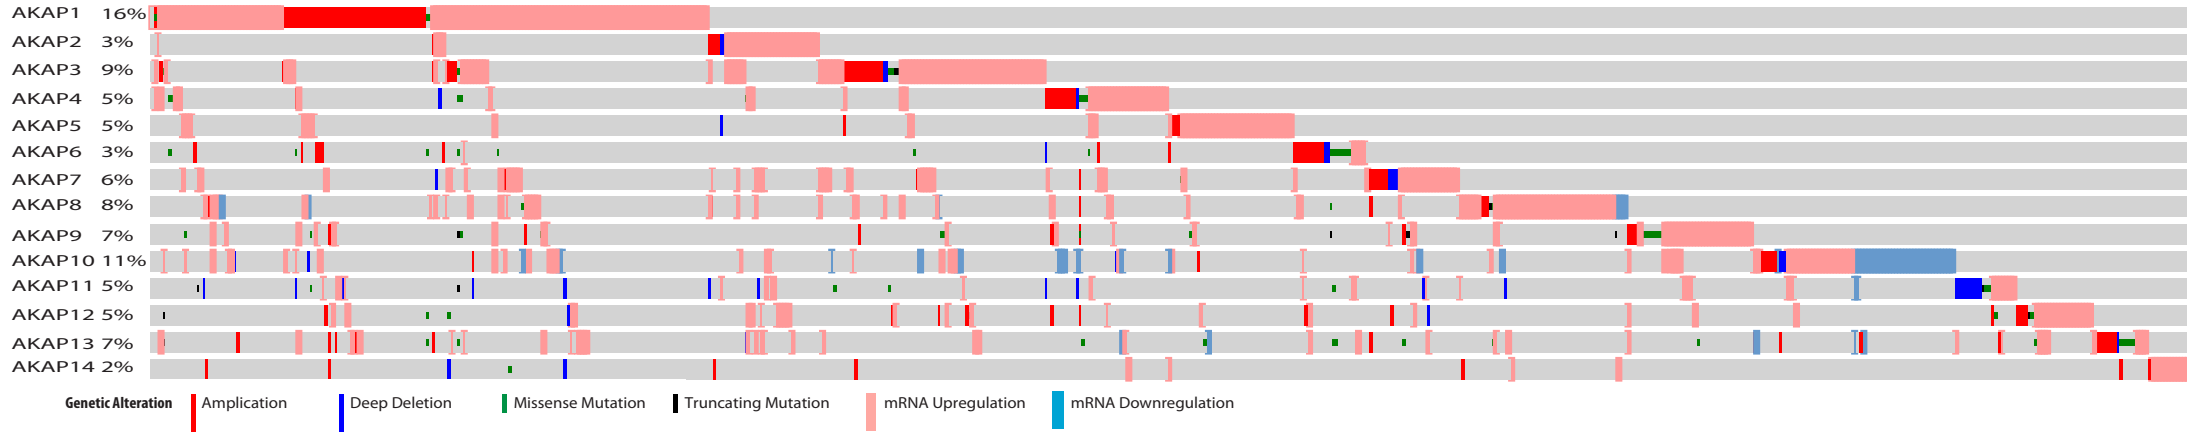

Supplement: MOESM7 [file 15459718]
